# Supplementary material for: Morphological analysis of three-dimensional MR images of patellofemoral joints in asymptomatic subjects
Source: PubMed Central journal article supplement (PMC10555988; doi:10.1038/s41598-023-42404-7), 2023-10-05

Supplementary Fig. 1

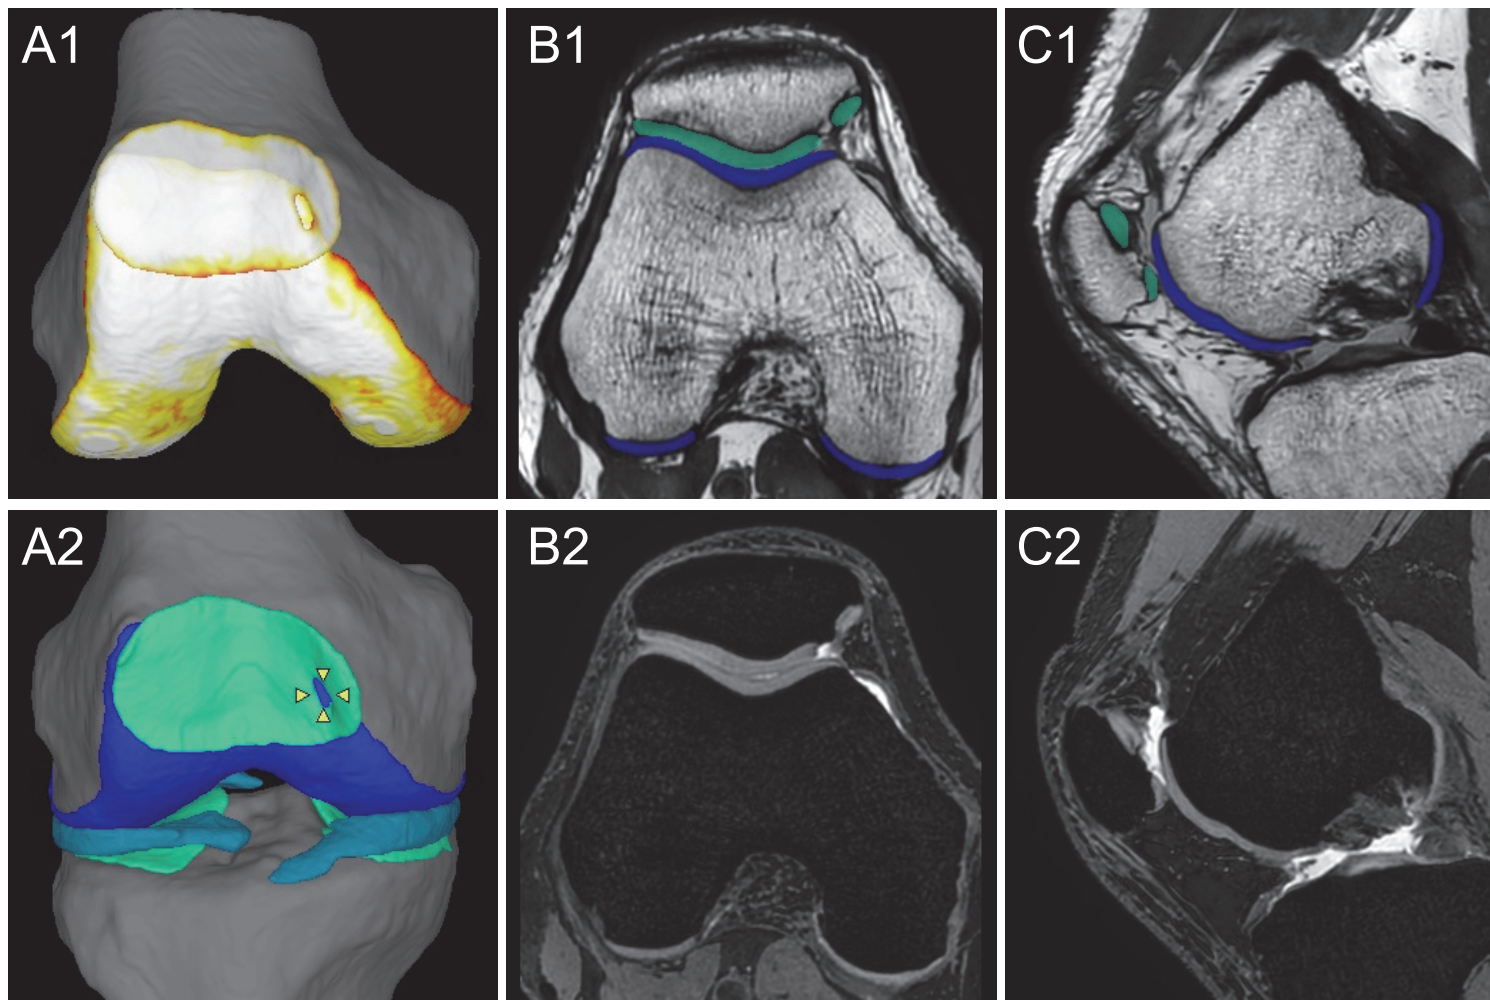

# Supplementary Fig. 2-1 (continued)

## Medial patellar cartilage lesions in all subjects

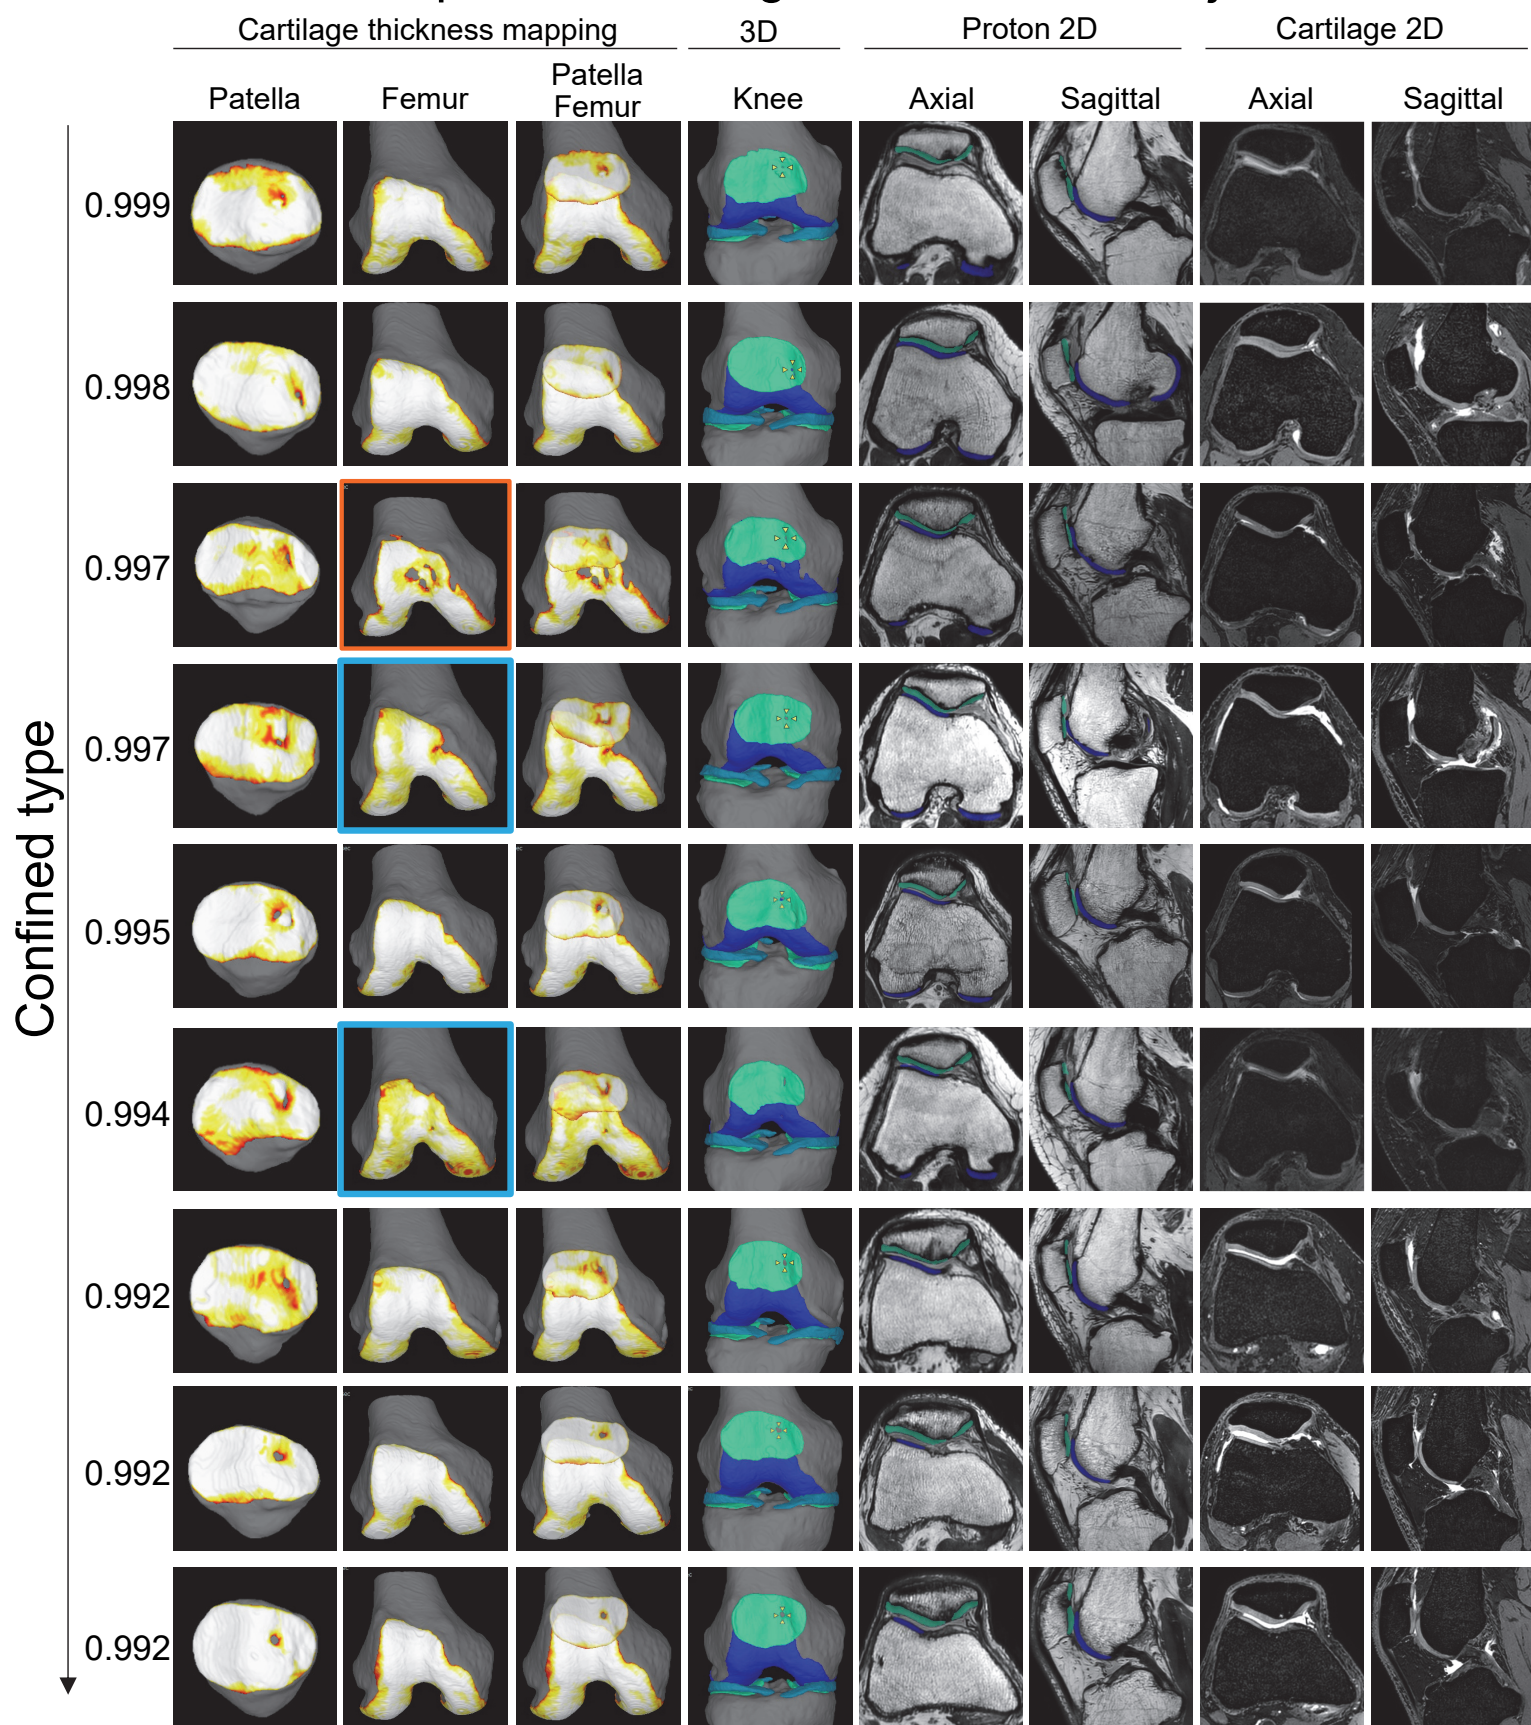

# Supplementary Fig. 2-2 (continued)

## Medial patellar cartilage lesions in all subjects

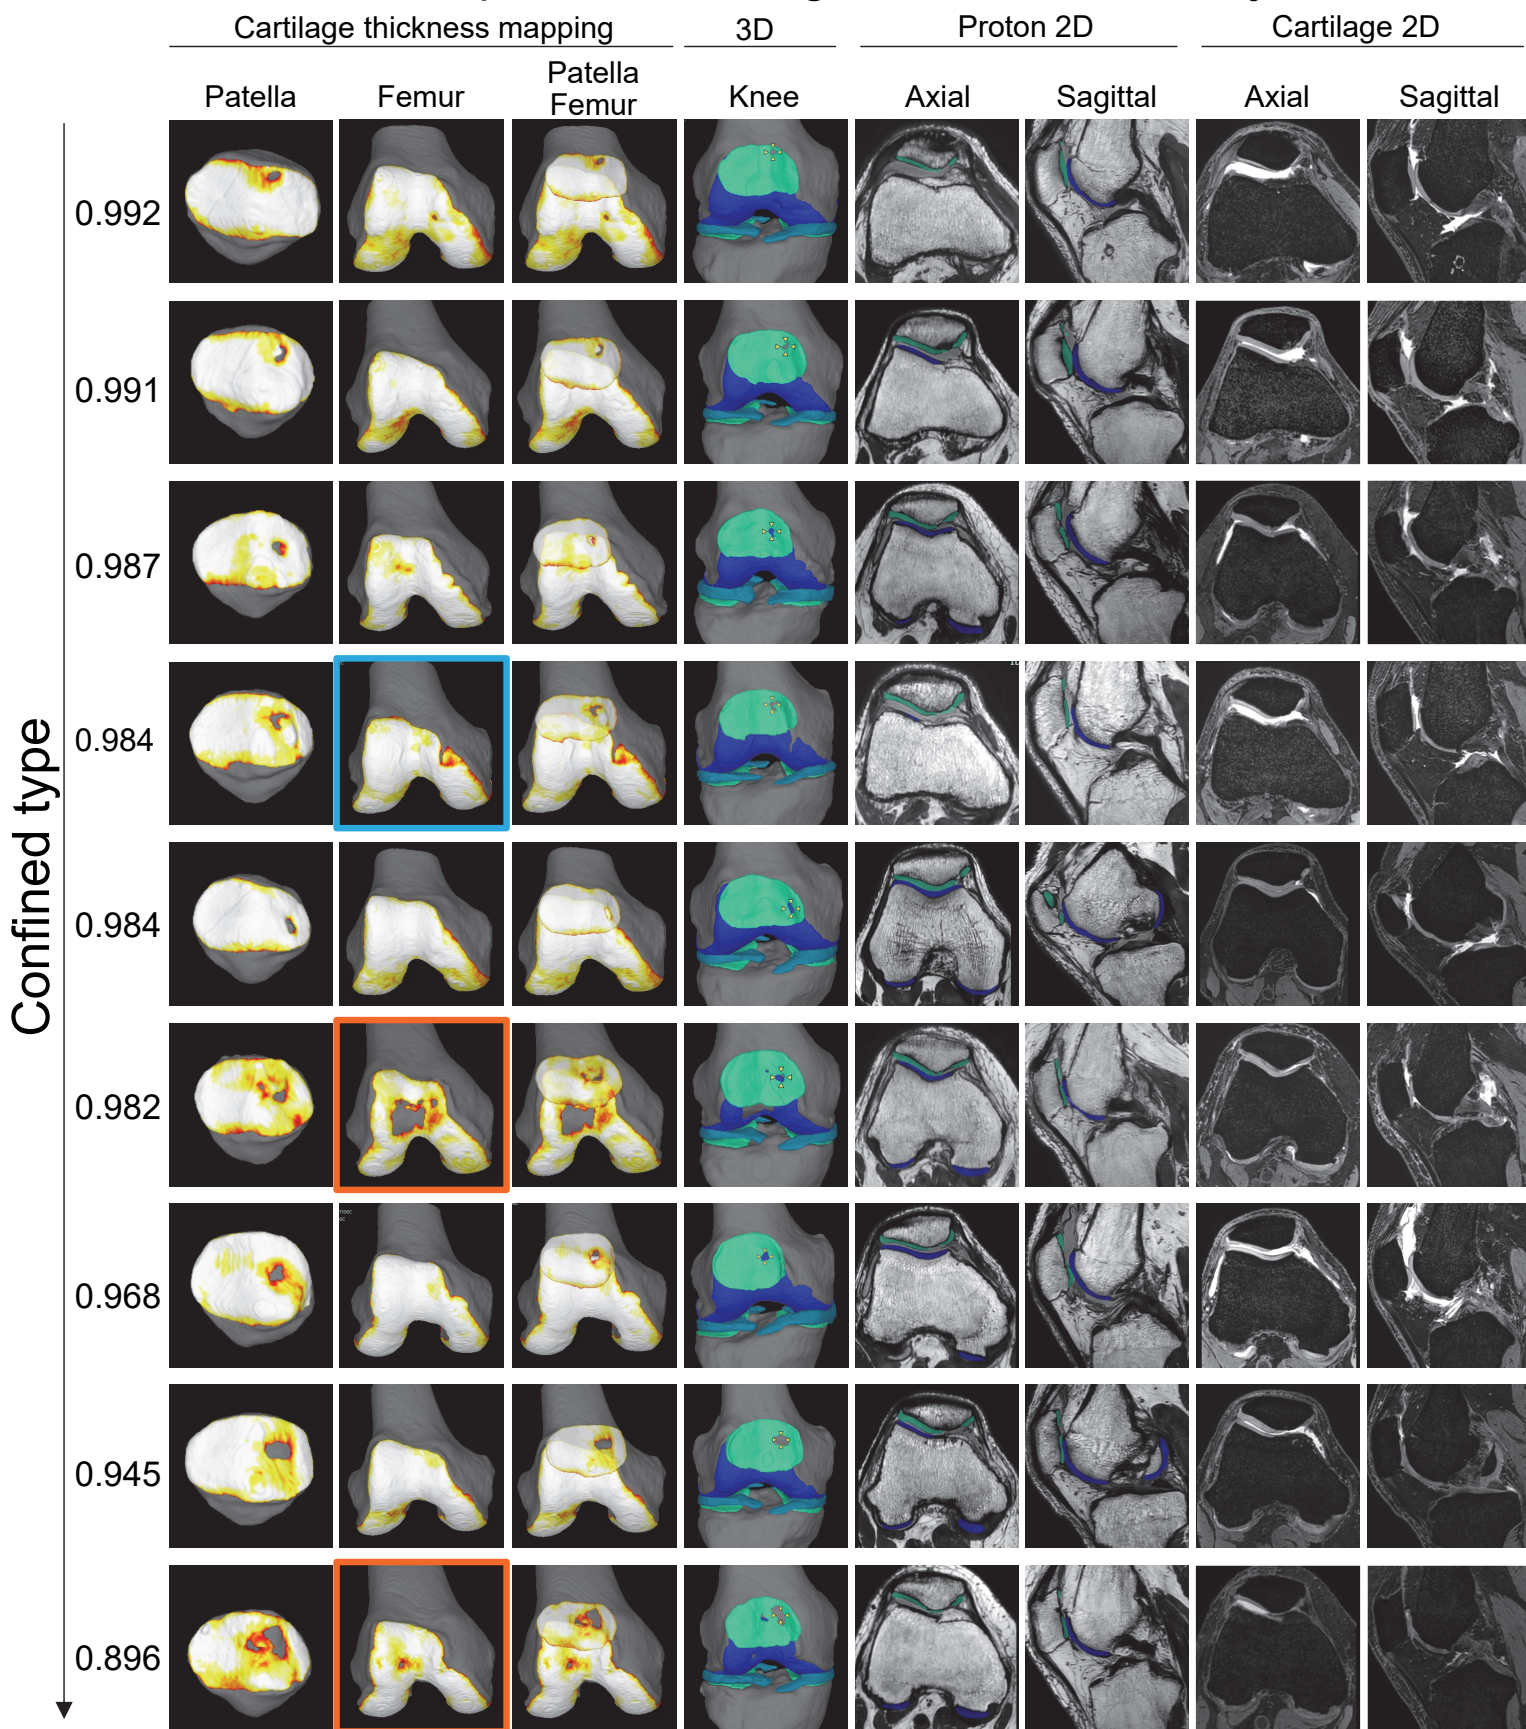

# Supplementary Fig. 2-3

## Medial patellar cartilage lesions in all subjects

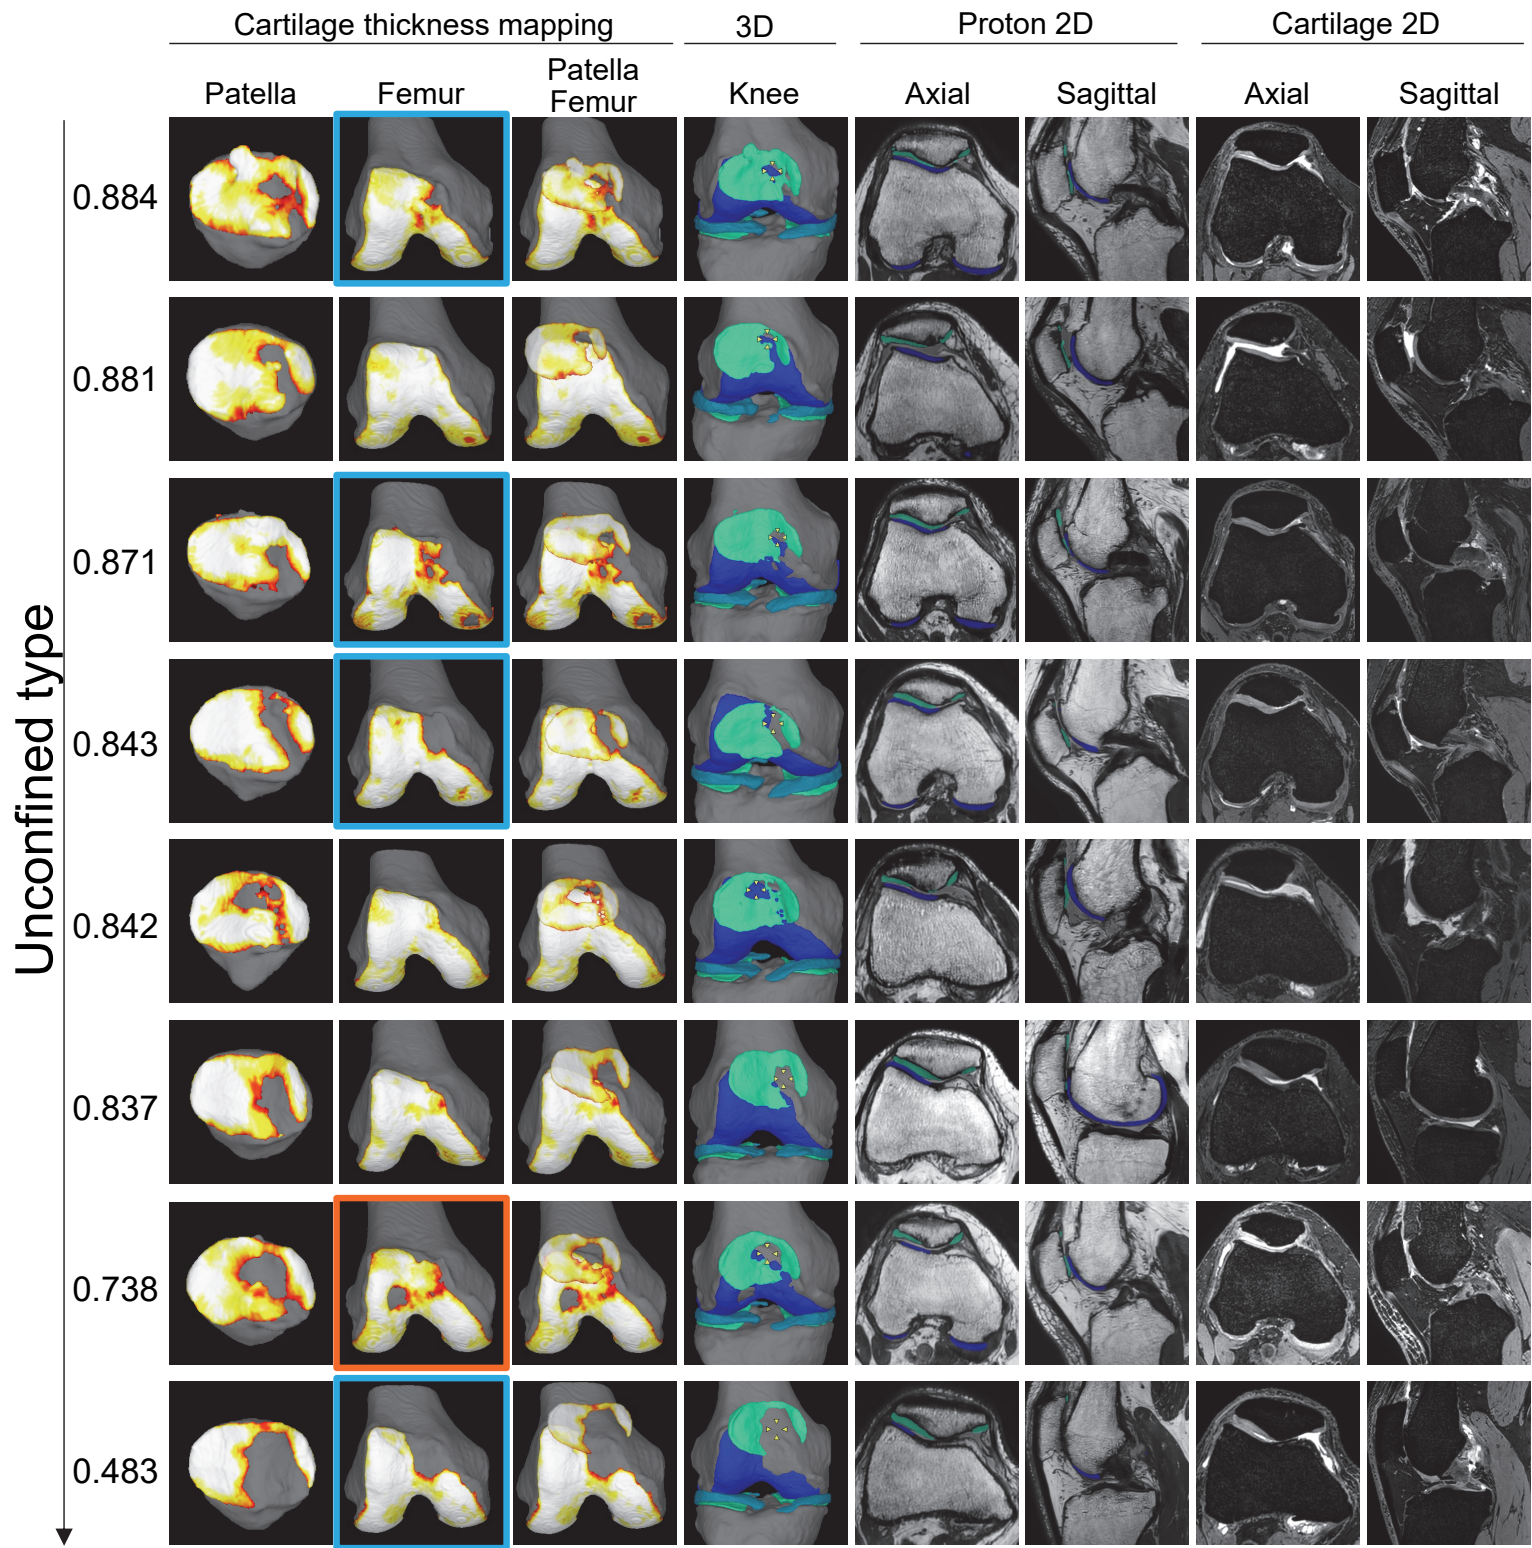

# Supplementary Fig. 3

## Lateral patellar cartilage lesions in all subjects

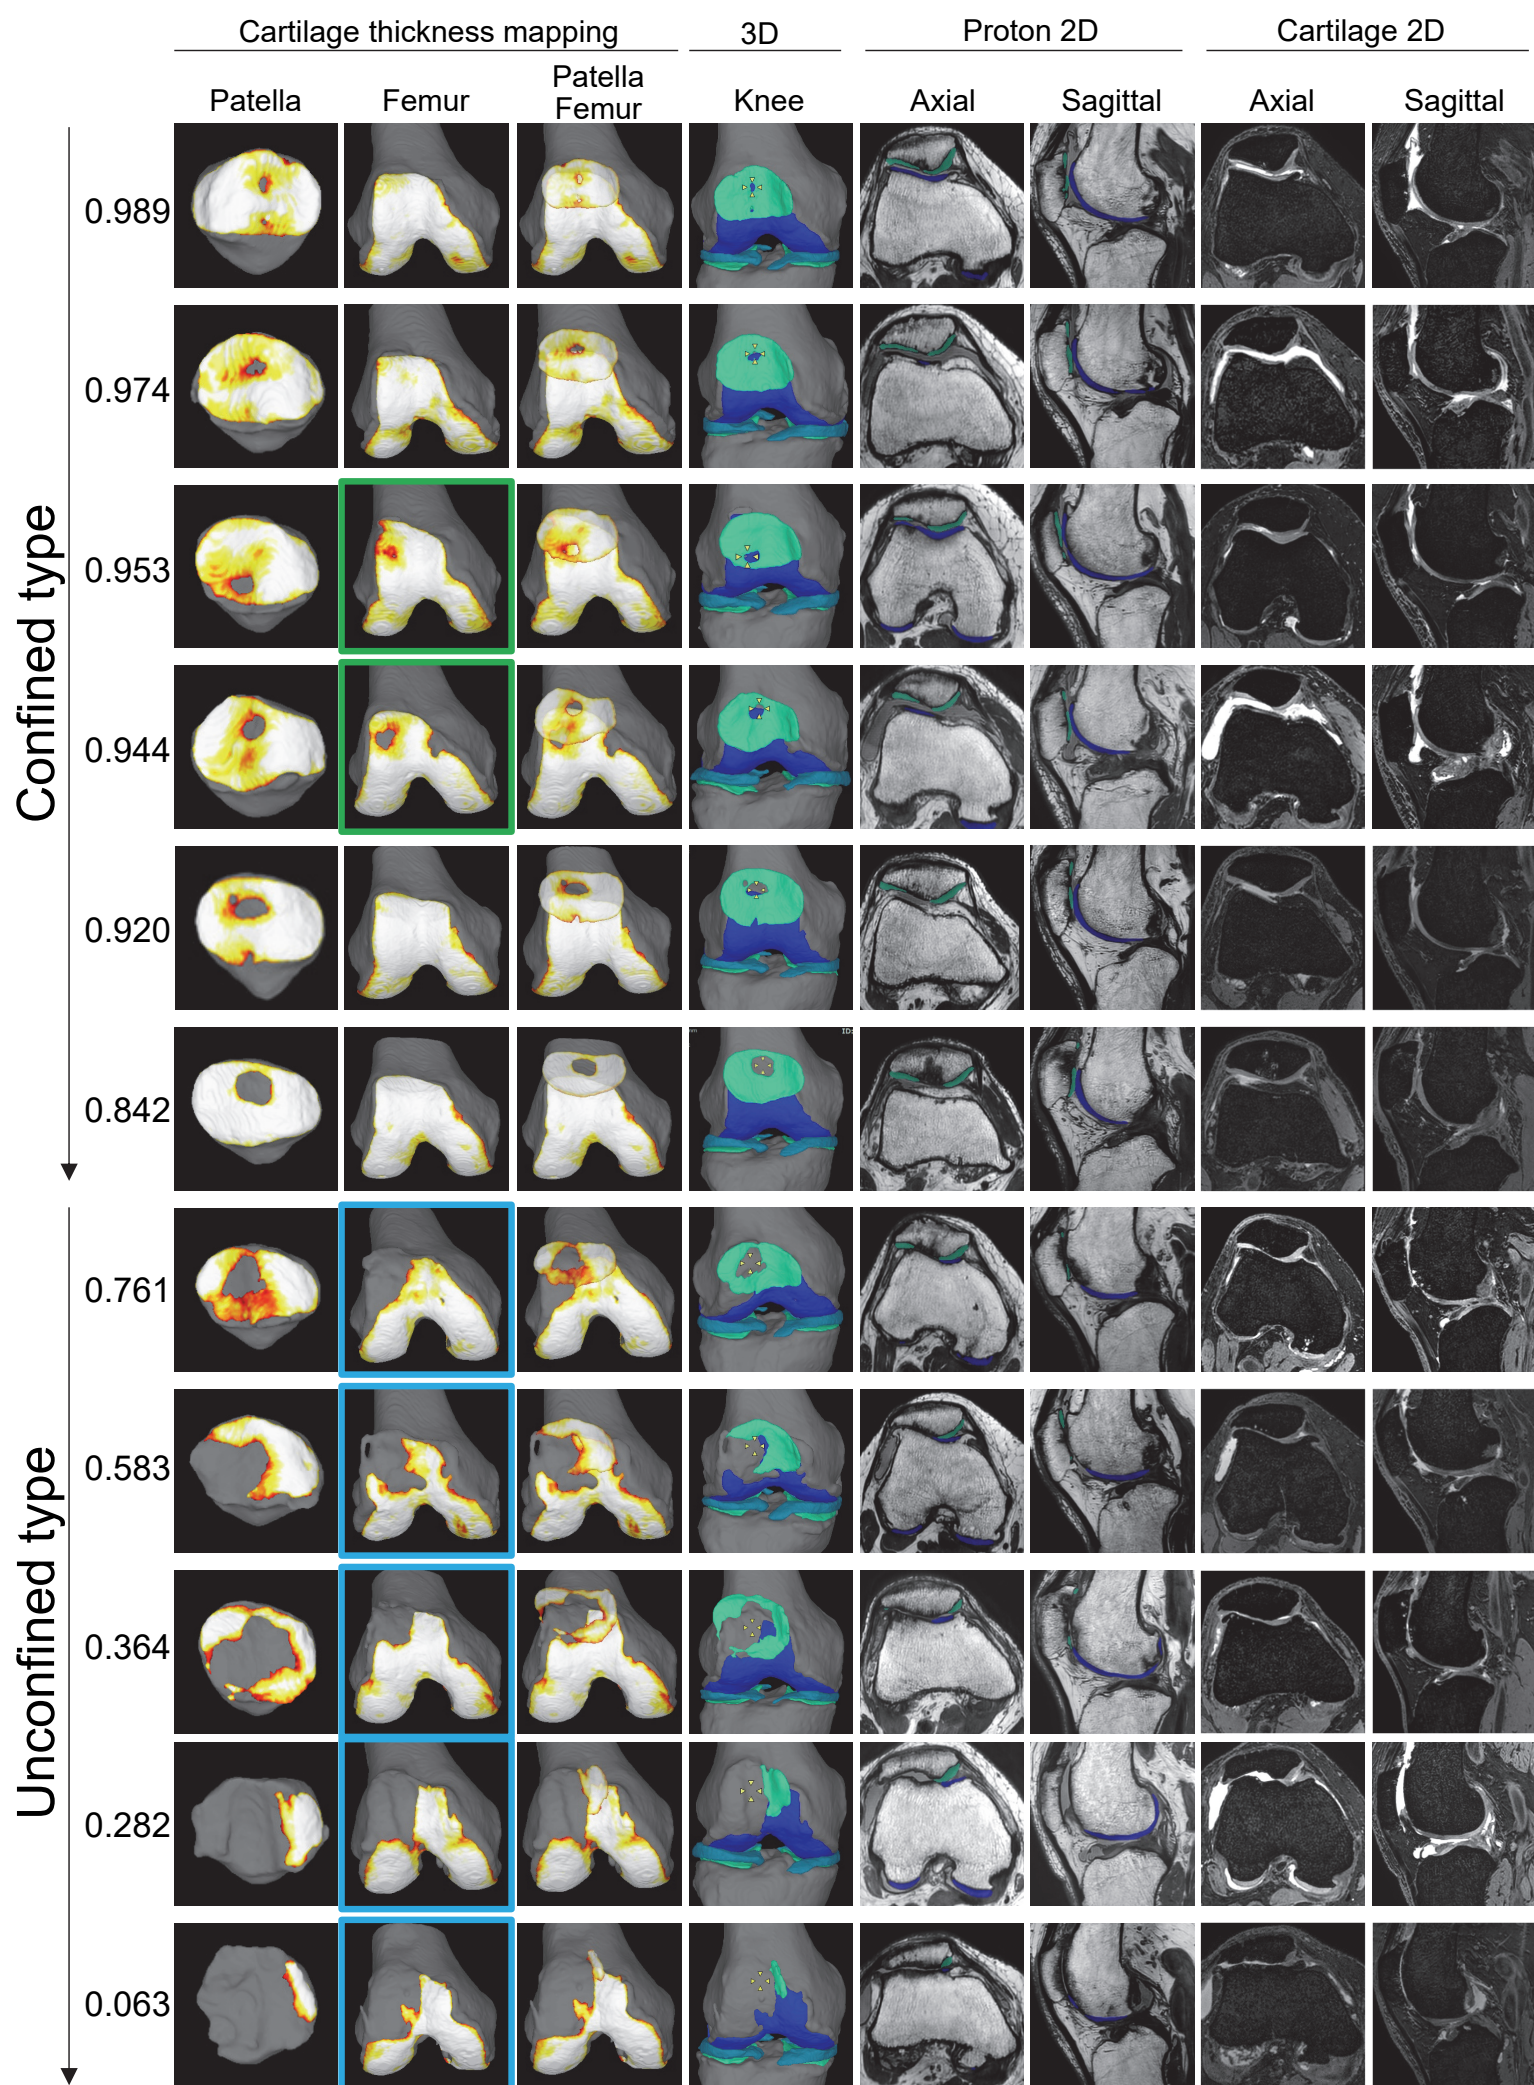

Supplement: 41598_2023_42404_MOESM1_ESM.pdf [file 41598_2023_42404_MOESM1_ESM.pdf]
